# Supplementary material for: Low-Level Clostridial Spores’ Milk to Limit the Onset of Late Blowing Defect in Lysozyme-Free, Grana-Type Cheese
Source: MDPI journal article supplement (doi:10.3390/foods12091880), 2023-05-02
Supplement: s1 [file s1]

L1

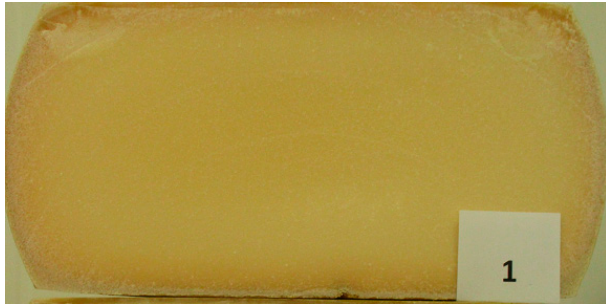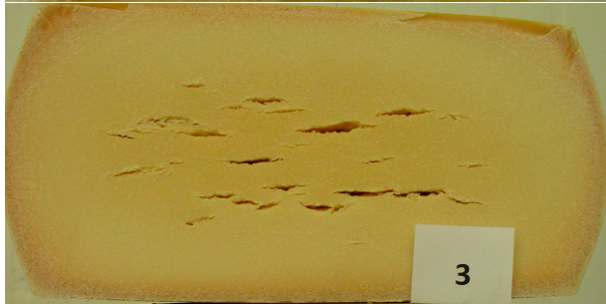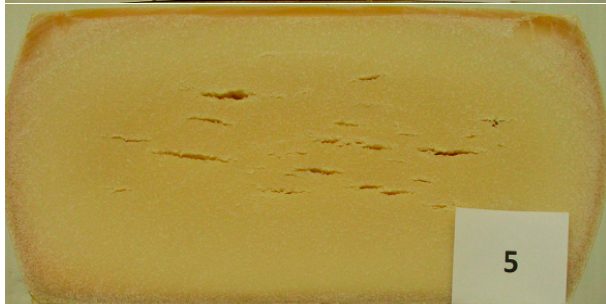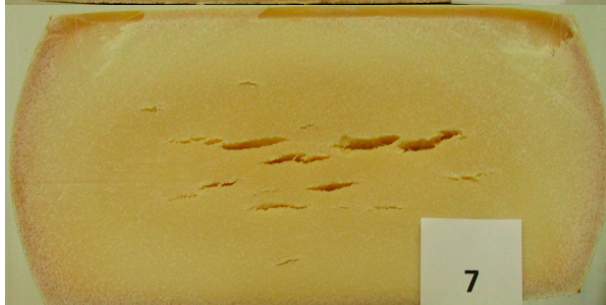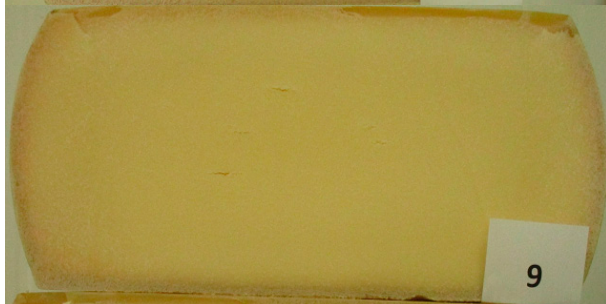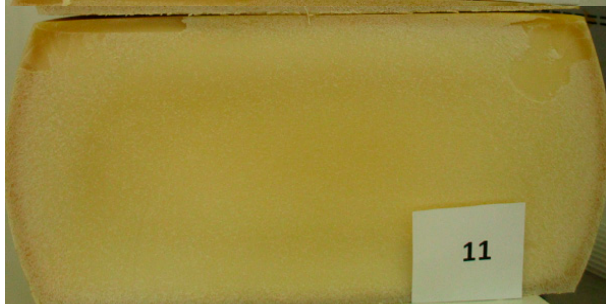

L2

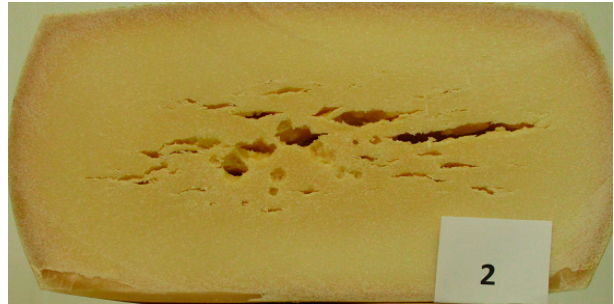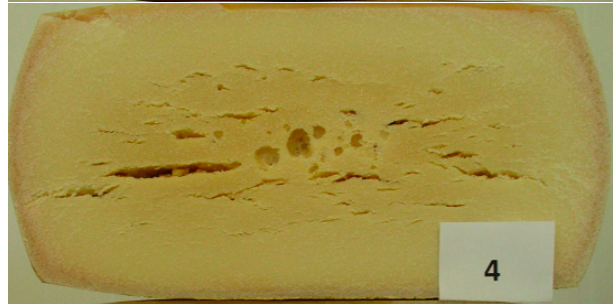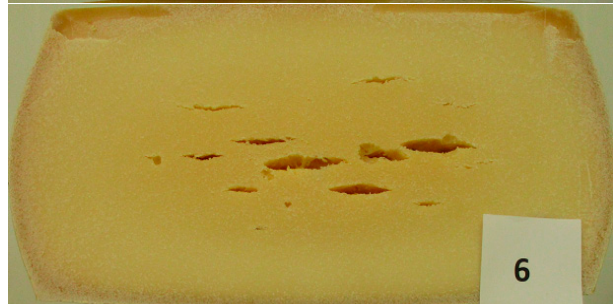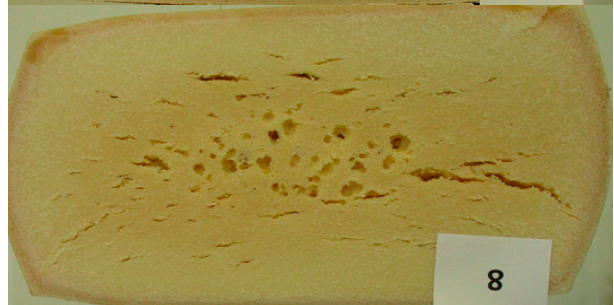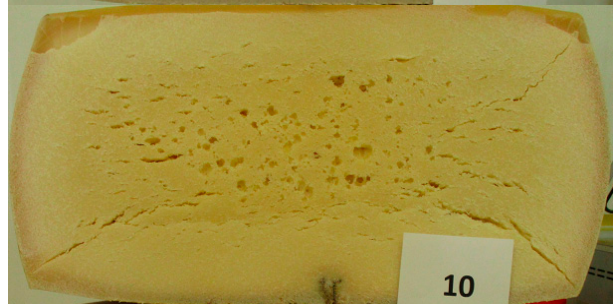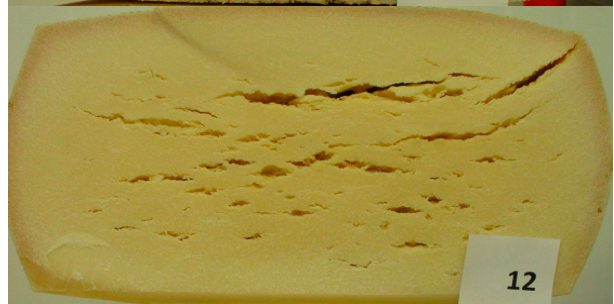

Figure S1. Grana-type cheeses manufactured without the use of lysozyme. Cheeses on the left column were obtained from L1 milk (BCS load  $< 2.0 \log \text{MPN L}^{-1}$ ); cheeses 3, 5, 7 and 1, 9, 11 were produced in the warm and cold season, respectively. Cheeses on the right column were obtained from L2 milk (BCS load  $\geq 3.0 \log \text{MPN L}^{-1}$ ); cheeses 4, 6, 8 and 2, 10, 12 were produced in the warm and cold season, respectively.
