# Supplementary material for: Low-Level Clostridial Spores’ Milk to Limit the Onset of Late Blowing Defect in Lysozyme-Free, Grana-Type Cheese
Source: MDPI journal article supplement (doi:10.3390/foods12091880), 2023-05-02
Supplement: s1 [file s1]

Table S4. Chemical composition of ripened Grana-type cheese manufactured with L1 and L2 milk.

| Cheesemaking trials       |                              |          | cheese ripening time (mo) | dry matter (%)     | ash (%)           | fat (%)            | protein (%)        | fat on DM (ratio) | protein on DM (ratio) | fat to protein (ratio) | salt (%)            |                      |                     | pH                  |                      |                     |
|---------------------------|------------------------------|----------|---------------------------|--------------------|-------------------|--------------------|--------------------|-------------------|-----------------------|------------------------|---------------------|----------------------|---------------------|---------------------|----------------------|---------------------|
| Milk quality <sup>1</sup> | Climatic period <sup>2</sup> | trial nr |                           |                    |                   |                    |                    |                   |                       |                        | overall sample      | outer zone           | inner zone          | overall sample      | outer zone           | inner zone          |
| L1                        | C                            | 1        | 13                        | 67.12              | 4.95              | 28.73              | 31.45              | 0.43              | 0.47                  | 0.91                   | 2.03                | 2.05                 | 1.87                | 5.28                | 5.29                 | 5.31                |
| L1                        | W                            | 3        | 11                        | 67.50              | 4.80              | 29.74              | 31.10              | 0.44              | 0.46                  | 0.96                   | 1.80                | 1.90                 | 1.45                | 5.39                | 5.39                 | 5.42                |
| L1                        | W                            | 5        | 11                        | 66.90              | 4.59              | 29.26              | 31.22              | 0.44              | 0.47                  | 0.94                   | 1.73                | 1.91                 | 1.35                | 5.30                | 5.32                 | 5.33                |
| L1                        | W                            | 7        | 10                        | 66.71              | 4.38              | 28.13              | 32.39              | 0.42              | 0.49                  | 0.87                   | 1.34                | 1.62                 | 1.08                | 5.46                | 5.47                 | 5.52                |
| L1                        | C                            | 9        | 7                         | 66.16              | 4.17              | 29.96              | 30.20              | 0.45              | 0.46                  | 0.99                   | 1.32                | 1.53                 | 0.76                | 5.27                | 5.30                 | 5.31                |
| L1                        | C                            | 11       | 7                         | 66.41              | 4.63              | 28.54              | 31.51              | 0.43              | 0.47                  | 0.91                   | 1.75                | 2.14                 | 1.06                | 5.36                | 5.36                 | 5.33                |
|                           |                              | average  | 9.8 <sup>A</sup>          | 66.80 <sup>A</sup> | 4.59 <sup>A</sup> | 29.06 <sup>A</sup> | 31.31 <sup>A</sup> | 0.44 <sup>A</sup> | 0.47 <sup>A</sup>     | 0.93 <sup>A</sup>      | 1.66 <sup>A,a</sup> | 1.86 <sup>A,ab</sup> | 1.26 <sup>A,b</sup> | 5.34 <sup>A,a</sup> | 5.36 <sup>A,a</sup>  | 5.37 <sup>A,a</sup> |
|                           |                              | SD       | 2.4                       | 0.48               | 0.28              | 0.72               | 0.71               | 0.01              | 0.01                  | 0.04                   | 0.28                | 0.24                 | 0.38                | 0.07                | 0.07                 | 0.08                |
| L2                        | C                            | 2        | 12                        | 66.02              | 4.88              | 26.93              | 32.31              | 0.41              | 0.49                  | 0.83                   | 1.97                | 2.08                 | 1.61                | 5.39                | 5.34                 | 5.50                |
| L2                        | W                            | 4        | 11                        | 67.22              | 4.59              | 28.60              | 32.30              | 0.43              | 0.48                  | 0.89                   | 1.64                | 1.88                 | 1.11                | 5.47                | 5.42                 | 5.87                |
| L2                        | W                            | 6        | 11                        | 67.75              | 4.58              | 28.57              | 32.80              | 0.42              | 0.48                  | 0.87                   | 1.54                | 1.67                 | 1.30                | 5.44                | 5.43                 | 5.48                |
| L2                        | W                            | 8        | 10                        | 65.57              | 4.66              | 26.56              | 32.52              | 0.41              | 0.50                  | 0.82                   | 1.69                | 1.93                 | 1.08                | 5.61                | 5.41                 | 5.84                |
| L2                        | C                            | 10       | 7                         | 65.42              | 4.91              | 26.72              | 32.11              | 0.41              | 0.49                  | 0.83                   | 2.10                | 2.17                 | 0.97                | 5.42                | 5.31                 | 5.80                |
| L2                        | C                            | 12       | 7                         | 64.09              | 4.68              | 25.69              | 31.87              | 0.40              | 0.50                  | 0.81                   | 1.72                | 1.99                 | 1.21                | 5.30                | 5.29                 | 5.34                |
|                           |                              | average  | 9.8 <sup>A</sup>          | 66.01 <sup>A</sup> | 4.72 <sup>A</sup> | 27.18 <sup>B</sup> | 32.32 <sup>B</sup> | 0.41 <sup>B</sup> | 0.49 <sup>B</sup>     | 0.84 <sup>B</sup>      | 1.78 <sup>A,a</sup> | 1.95 <sup>A,a</sup>  | 1.21 <sup>A,b</sup> | 5.44 <sup>A,a</sup> | 5.37 <sup>A,ab</sup> | 5.64 <sup>B,b</sup> |
|                           |                              | SD       | 2.3                       | 1.32               | 0.15              | 1.17               | 0.32               | 0.01              | 0.01                  | 0.03                   | 0.21                | 0.18                 | 0.22                | 0.10                | 0.06                 | 0.23                |

| Cheesemaking trials       |                              |          | Organic acids (g on kg DM) |                      |                      |                      |                      |                      |                      |                      |                      |                      |                      |                      |                    |                    |
|---------------------------|------------------------------|----------|----------------------------|----------------------|----------------------|----------------------|----------------------|----------------------|----------------------|----------------------|----------------------|----------------------|----------------------|----------------------|--------------------|--------------------|
|                           |                              |          | lactic                     |                      |                      | butyric              |                      |                      | propionic            |                      |                      | acetic               |                      |                      | succinic           | pyroglutamic       |
| Milk quality <sup>1</sup> | Climatic period <sup>2</sup> | trial nr | overall sample             | outer zone           | inner zone           | overall sample       | outer zone           | inner zone           | overall sample       | outer zone           | inner zone           | overall sample       | outer zone           | inner zone           | overall sample     | overall sample     |
| L1                        | C                            | 1        | 26.73                      | 25.76                | 25.97                | 0.000                | 0.000                | 0.000                | 0.000                | 0.000                | 0.000                | 1.862                | 1.654                | 2.011                | 0.998              | 4.991              |
| L1                        | W                            | 3        | 24.49                      | 23.13                | 23.51                | 0.000                | 0.000                | 0.385                | 0.000                | 0.000                | 0.000                | 2.104                | 1.941                | 2.133                | 0.978              | 4.296              |
| L1                        | W                            | 5        | 24.34                      | 24.49                | 23.57                | 0.000                | 0.000                | 0.000                | 0.000                | 0.000                | 0.000                | 1.958                | 1.854                | 1.869                | 0.972              | 3.991              |
| L1                        | W                            | 7        | 24.16                      | 24.61                | 21.80                | 0.000                | 0.000                | 1.124                | 0.000                | 0.000                | 0.000                | 2.189                | 2.174                | 1.934                | 0.869              | 3.747              |
| L1                        | C                            | 9        | 25.45                      | 23.75                | 24.90                | 0.000                | 0.000                | 0.000                | 0.000                | 0.000                | 0.000                | 1.255                | 1.224                | 0.982                | 0.892              | 2.962              |
| L1                        | C                            | 11       | 23.37                      | 21.62                | 24.21                | 0.000                | 0.000                | 0.000                | 0.000                | 0.000                | 0.000                | 1.717                | 1.671                | 1.476                | 0.873              | 2.545              |
|                           |                              | average  | 24.76 <sup>A,a</sup>       | 23.89 <sup>A,a</sup> | 23.99 <sup>A,a</sup> | 0.000 <sup>A,a</sup> | 0.000 <sup>A,a</sup> | 0.252 <sup>A,a</sup> | 0.000 <sup>A,a</sup> | 0.000 <sup>A,a</sup> | 0.000 <sup>A,a</sup> | 1.847 <sup>A,a</sup> | 1.753 <sup>A,a</sup> | 1.734 <sup>A,a</sup> | 0.930 <sup>A</sup> | 3.756 <sup>A</sup> |
|                           |                              | SD       | 1.17                       | 1.42                 | 1.41                 | 0.000                | 0.000                | 0.454                | 0.000                | 0.000                | 0.000                | 0.336                | 0.322                | 0.430                | 0.058              | 0.891              |
| L2                        | C                            | 2        | 25.70                      | 25.58                | 21.73                | 0.000                | 0.000                | 2.302                | 0.000                | 0.000                | 0.000                | 2.014                | 1.787                | 1.742                | 1.045              | 4.529              |
| L2                        | W                            | 4        | 21.66                      | 22.18                | 10.49                | 1.190                | 0.000                | 5.921                | 0.000                | 0.000                | 1.041                | 1.904                | 1.979                | 1.205                | 0.937              | 4.017              |
| L2                        | W                            | 6        | 23.64                      | 24.06                | 22.15                | 0.000                | 0.000                | 0.443                | 0.000                | 0.000                | 0.000                | 2.125                | 1.963                | 2.111                | 0.871              | 3.778              |
| L2                        | W                            | 8        | 23.17                      | 24.36                | 13.33                | 1.586                | 0.000                | 6.024                | 0.244                | 0.000                | 1.190                | 2.105                | 1.983                | 1.769                | 0.808              | 4.255              |
| L2                        | C                            | 10       | 21.22                      | 23.07                | 7.87                 | 1.727                | 0.000                | 7.352                | 0.290                | 0.000                | 1.513                | 1.590                | 1.697                | 0.810                | 0.764              | 2.583              |
| L2                        | C                            | 12       | 25.74                      | 25.09                | 24.53                | 0.328                | 0.000                | 1.716                | 0.000                | 0.000                | 0.218                | 2.013                | 1.888                | 1.763                | 0.858              | 2.684              |
|                           |                              | average  | 23.52 <sup>A,a</sup>       | 24.06 <sup>A,a</sup> | 16.68 <sup>B,b</sup> | 0.805 <sup>A,a</sup> | 0.000 <sup>A,a</sup> | 3.960 <sup>B,b</sup> | 0.089 <sup>A,a</sup> | 0.000 <sup>A,a</sup> | 0.660 <sup>A,a</sup> | 1.959 <sup>A,a</sup> | 1.883 <sup>A,a</sup> | 1.567 <sup>A,a</sup> | 0.881 <sup>A</sup> | 3.641 <sup>A</sup> |
|                           |                              | SD       | 1.93                       | 1.26                 | 6.99                 | 0.792                | 0.000                | 2.820                | 0.139                | 0.000                | 0.666                | 0.197                | 0.118                | 0.471                | 0.100              | 0.820              |

<sup>1</sup>milk from farms recognized for low (L1) or high (L2) content of butyric clostridia spores.

<sup>2</sup>climate of the period when the cheesemaking was carried out: warm (W), cool (C).

<sup>A,B</sup> average values in column with different capital letters are different ( $P < 0.05$ )

<sup>a,b</sup> for parameters measured in different layers of each cheese sample, average values in row with different lowercase letters are different ( $P < 0.05$ )
