# Supplementary material for: Low-Level Clostridial Spores’ Milk to Limit the Onset of Late Blowing Defect in Lysozyme-Free, Grana-Type Cheese
Source: MDPI journal article supplement (doi:10.3390/foods12091880), 2023-05-02
Supplement: s1 [file s1]

Table S3. Technical parameters recorded during cheese manufacturing trials.

| Cheesemaking trials       |                              |          | Cheesemaking parameters |                   |                                |                   |                   |                       |                    |                           |                                |                   |                   |
|---------------------------|------------------------------|----------|-------------------------|-------------------|--------------------------------|-------------------|-------------------|-----------------------|--------------------|---------------------------|--------------------------------|-------------------|-------------------|
|                           |                              |          | Vat milk                |                   |                                |                   |                   |                       |                    | Whey starter culture (WS) |                                |                   |                   |
| Milk quality <sup>1</sup> | Climatic period <sup>2</sup> | trial nr | temperature (°C)        | pH                | titratable acidity (°SH/50 ml) | fat (%)           | protein (%)       | fat to casein (ratio) | dry matter (%)     | pH                        | titratable acidity (°SH/50 ml) | temperature (°C)  | quantity (g)      |
| L1                        | C                            | 1a       | 16.0                    | 6.62              | 3.4                            | 2.97              | 3.35              | 1.14                  | 12.34              | 3.54                      | 27.8                           | 20.2              | 1300              |
|                           |                              | 1b       | 17.2                    | 6.58              | 3.4                            | 2.97              | 3.35              | 1.14                  | 12.30              | 3.54                      | 27.8                           | 20.2              | 1300              |
| L1                        | W                            | 3a       | 13.8                    | 6.67              | 3.3                            | 2.91              | 3.32              | 1.12                  | 12.28              | 3.29                      | 27.6                           | 22.5              | 1500              |
|                           |                              | 3b       | 13.9                    | 6.67              | 3.3                            | 2.91              | 3.32              | 1.12                  | 12.27              | 3.29                      | 27.6                           | 22.5              | 1500              |
| L1                        | W                            | 5a       | 13.9                    | 6.62              | 3.3                            | 2.69              | 3.30              | 1.05                  | 12.07              | 3.32                      | 28.0                           | 22.1              | 1600              |
|                           |                              | 5b       | 14.1                    | 6.65              | 3.3                            | 2.71              | 3.30              | 1.05                  | 12.09              | 3.32                      | 28.0                           | 22.1              | 1600              |
| L1                        | W                            | 7a       | 14.2                    | 6.64              | 3.3                            | 2.56              | 3.28              | 1.00                  | 11.90              | 3.25                      | 28.5                           | 23.2              | 1400              |
|                           |                              | 7b       | 14.1                    | 6.68              | 3.3                            | 2.50              | 3.24              | 0.99                  | 11.79              | 3.25                      | 28.5                           | 23.2              | 1400              |
| L1                        | C                            | 9a       | 14.0                    | 6.74              | 3.5                            | 2.95              | 3.37              | 1.12                  | 12.39              | 3.36                      | 28.7                           | 20.7              | 1500              |
|                           |                              | 9b       | 14.0                    | 6.74              | 3.5                            | 2.95              | 3.37              | 1.12                  | 12.40              | 3.36                      | 28.7                           | 20.7              | 1500              |
| L1                        | C                            | 11a      | 13.8                    | 6.72              | 3.4                            | 2.78              | 3.50              | 1.02                  | 12.33              | 3.34                      | 29.5                           | 20.9              | 1700              |
|                           |                              | 11b      | 13.8                    | 6.72              | 3.4                            | 2.78              | 3.50              | 1.02                  | 12.33              | 3.34                      | 29.5                           | 20.9              | 1700              |
|                           |                              | average  | 14.4 <sup>A</sup>       | 6.67 <sup>A</sup> | 3.4 <sup>A</sup>               | 2.81 <sup>A</sup> | 3.35 <sup>A</sup> | 1.07 <sup>A</sup>     | 12.21 <sup>A</sup> | 3.35 <sup>A</sup>         | 28.4 <sup>A</sup>              | 21.6 <sup>A</sup> | 1500 <sup>A</sup> |
|                           |                              | SD       | 1.1                     | 0.05              | 0.1                            | 0.16              | 0.08              | 0.06                  | 0.20               | 0.10                      | 0.7                            | 1.1               | 135               |
| L2                        | C                            | 2a       | 14.0                    | 6.66              | 3.2                            | 2.67              | 3.33              | 1.00                  | 11.92              | 3.29                      | 28.6                           | 22.0              | 1500              |
|                           |                              | 2b       | 14.2                    | 6.63              | 3.2                            | 2.67              | 3.33              | 1.00                  | nd                 | 3.29                      | 28.6                           | 22.0              | 1500              |
| L2                        | W                            | 4a       | 14.0                    | 6.69              | 3.1                            | 2.60              | 3.38              | 0.99                  | 12.02              | 3.45                      | 28.7                           | 22.8              | 1560              |
|                           |                              | 4b       | 14.4                    | 6.66              | 3.1                            | 2.60              | 3.39              | 0.98                  | 12.02              | 3.45                      | 28.7                           | 22.8              | 1560              |
| L2                        | W                            | 6a       | 14.1                    | 6.64              | 3.1                            | 2.53              | 3.37              | 0.96                  | 11.90              | 3.29                      | 30.0                           | 23.0              | 1450              |
|                           |                              | 6b       | 14.0                    | 6.67              | 3.2                            | 2.52              | 3.36              | 0.96                  | 11.88              | 3.29                      | 30.0                           | 23.0              | 1450              |
| L2                        | W                            | 8a       | 13.8                    | 6.65              | 3.2                            | 2.35              | 3.40              | 0.89                  | 11.79              | 3.37                      | 29.3                           | 24.6              | 1500              |
|                           |                              | 8b       | 14.2                    | 6.67              | 3.2                            | 2.35              | 3.40              | 0.89                  | 11.80              | 3.37                      | 29.3                           | 24.6              | 1580              |
| L2                        | C                            | 10a      | 13.8                    | 6.76              | 3.4                            | 2.61              | 3.65              | 0.92                  | 12.27              | 3.36                      | 28.4                           | 20.7              | 1800              |
|                           |                              | 10b      | 13.8                    | 6.76              | 3.4                            | 2.61              | 3.65              | 0.92                  | 12.28              | 3.36                      | 28.4                           | 20.7              | 1800              |
| L2                        | C                            | 12a      | 14.2                    | 6.73              | 3.5                            | 2.58              | 3.64              | 0.91                  | 12.24              | 3.41                      | 27.2                           | 20.6              | 1900              |
|                           |                              | 12b      | 13.9                    | 6.77              | 3.5                            | 2.57              | 3.59              | 0.89                  | 12.23              | 3.41                      | 27.2                           | 20.6              | 1900              |
|                           |                              | average  | 14.0 <sup>A</sup>       | 6.69 <sup>A</sup> | 3.3 <sup>B</sup>               | 2.56 <sup>B</sup> | 3.46 <sup>B</sup> | 0.94 <sup>B</sup>     | 12.03 <sup>B</sup> | 3.36 <sup>A</sup>         | 28.7 <sup>A</sup>              | 22.3 <sup>A</sup> | 1625 <sup>A</sup> |
|                           |                              | SD       | 0.2                     | 0.05              | 0.2                            | 0.11              | 0.13              | 0.04                  | 0.19               | 0.06                      | 0.9                            | 1.5               | 173               |

Continue

| Cheesemaking trials       |                              |          | Cheesemaking parameters    |                                |                   |                                     |                                |                   |                        |                           |                              |
|---------------------------|------------------------------|----------|----------------------------|--------------------------------|-------------------|-------------------------------------|--------------------------------|-------------------|------------------------|---------------------------|------------------------------|
|                           |                              |          | Vat milk after WS addition |                                |                   | Vat milk at time of rennet addition |                                |                   | Renneting              |                           |                              |
| Milk quality <sup>1</sup> | Climatic period <sup>2</sup> | trial nr | pH                         | titratable acidity (°SH/50 ml) | temperature (°C)  | pH                                  | titratable acidity (°SH/50 ml) | temperature (°C)  | coagulation time (min) | manual cutting time (sec) | mechanical cutting time(sec) |
| L1                        | C                            | 1a       | 6.45                       | 4.0                            | 18.0              | 6.40                                | 4.2                            | 33.5              | 12.3                   | 39                        | 61                           |
|                           |                              | 1b       | 6.43                       | 4.0                            | 18.0              | 6.41                                | 4.2                            | 33.4              | 12.4                   | 46                        | 58                           |
| L1                        | W                            | 3a       | 6.41                       | 4.0                            | 22.5              | 6.41                                | 4.0                            | 33.2              | 11.3                   | 60                        | 55                           |
|                           |                              | 3b       | 6.43                       | 3.9                            | 21.8              | 6.41                                | 3.9                            | 33.2              | 11.2                   | 37                        | 36                           |
| L1                        | W                            | 5a       | 6.43                       | 4.0                            | 21.0              | 6.41                                | 4.1                            | 33.2              | 10.5                   | 56                        | 67                           |
|                           |                              | 5b       | 6.43                       | 4.0                            | 21.0              | 6.41                                | 4.2                            | 33.3              | 10.5                   | 105                       | 64                           |
| L1                        | W                            | 7a       | 6.43                       | 4.1                            | 21.7              | 6.40                                | 4.1                            | 33.3              | 11.4                   | 44                        | 74                           |
|                           |                              | 7b       | 6.41                       | 4.1                            | 21.4              | 6.41                                | 4.1                            | 33.3              | 11.1                   | 42                        | 78                           |
| L1                        | C                            | 9a       | 6.43                       | 4.3                            | 21.8              | 6.39                                | 4.3                            | 33.4              | 9.5                    | 38                        | 97                           |
|                           |                              | 9b       | 6.43                       | 4.4                            | 21.0              | 6.40                                | 4.4                            | 33.4              | 9.4                    | 55                        | 79                           |
| L1                        | C                            | 11a      | 6.44                       | 4.3                            | 21.3              | 6.41                                | 4.3                            | 33.2              | 10.4                   | 39                        | 76                           |
|                           |                              | 11b      | 6.44                       | 4.3                            | 21.7              | 6.40                                | 4.3                            | 33.4              | 9.4                    | 30                        | 87                           |
|                           |                              | average  | 6.43 <sup>A</sup>          | 4.1 <sup>A</sup>               | 20.9 <sup>A</sup> | 6.41 <sup>A</sup>                   | 4.2 <sup>A</sup>               | 33.3 <sup>A</sup> | 10.8 <sup>A</sup>      | 49 <sup>A</sup>           | 69 <sup>A</sup>              |
|                           |                              | SD       | 0.01                       | 0.2                            | 1.4               | 0.01                                | 0.2                            | 0.1               | 1.0                    | 20                        | 16                           |
| L2                        | C                            | 2a       | 6.44                       | 4.0                            | 22.2              | 6.40                                | 4.0                            | 33.0              | 11.5                   | 42                        | 59                           |
|                           |                              | 2b       | 6.43                       | 4.0                            | 21.8              | 6.41                                | 4.0                            | 33.0              | 11.3                   | 33                        | 55                           |
| L2                        | W                            | 4a       | 6.44                       | 4.0                            | 21.4              | 6.41                                | 4.0                            | 33.1              | 11.2                   | 42                        | 91                           |
|                           |                              | 4b       | 6.42                       | 4.0                            | 22.8              | 6.41                                | 4.0                            | 33.3              | 11.1                   | 35                        | 80                           |
| L2                        | W                            | 6a       | 6.42                       | 3.9                            | 21.0              | 6.42                                | 3.9                            | 33.3              | 11.3                   | 43                        | 83                           |
|                           |                              | 6b       | 6.43                       | 3.9                            | 21.3              | 6.41                                | 4.0                            | 33.4              | 11.2                   | 41                        | 84                           |
| L2                        | W                            | 8a       | 6.39                       | 4.0                            | 21.1              | 6.40                                | 4.0                            | 33.3              | 10.6                   | 75                        | 80                           |
|                           |                              | 8b       | 6.41                       | 4.0                            | 21.8              | 6.38                                | 4.0                            | 33.2              | 10.3                   | 52                        | 79                           |
| L2                        | C                            | 10a      | 6.45                       | 4.3                            | 21.5              | 6.41                                | 4.3                            | 33.2              | 10.3                   | 43                        | 92                           |
|                           |                              | 10b      | 6.46                       | 4.3                            | 21.4              | 6.41                                | 4.3                            | 33.3              | 10.4                   | 24                        | 92                           |
| L2                        | C                            | 12a      | 6.47                       | 4.3                            | 21.3              | 6.43                                | 4.3                            | 33.2              | 11.1                   | 38                        | 89                           |
|                           |                              | 12b      | 6.47                       | 4.3                            | 21.5              | 6.42                                | 4.3                            | 33.2              | 10.5                   | 98                        | 81                           |
|                           |                              | average  | 6.44 <sup>A</sup>          | 4.1 <sup>A</sup>               | 21.6 <sup>A</sup> | 6.41 <sup>A</sup>                   | 4.1 <sup>A</sup>               | 33.2 <sup>B</sup> | 10.9 <sup>A</sup>      | 47 <sup>A</sup>           | 80 <sup>A</sup>              |
|                           |                              | SD       | 0.02                       | 0.2                            | 0.5               | 0.01                                | 0.2                            | 0.1               | 0.4                    | 20                        | 12                           |

continue

| Cheesemaking trials       |                              |          | Cheesemaking parameters     |                    |                       |                       |                                       |                                     |                            |                                 |                                    |                          |
|---------------------------|------------------------------|----------|-----------------------------|--------------------|-----------------------|-----------------------|---------------------------------------|-------------------------------------|----------------------------|---------------------------------|------------------------------------|--------------------------|
| Milk quality <sup>1</sup> | Climatic period <sup>2</sup> | trial nr | Curd processing (vat steps) |                    |                       |                       |                                       |                                     |                            |                                 |                                    |                          |
|                           |                              |          | cooking temperature (°C)    | cooking time (min) | rest under whey (min) | whey after cooking pH | whey after cooking titratable acidity | whey after cooking temperature (°C) | whey after curd extrac. pH | whey after curd extrac. acidity | whey after curd extrac. temp. (°C) | curd drainage time (min) |
| L1                        | C                            | 1a       | 53.2                        | 5.3                | 62                    | 6.30                  | 2.9                                   | 53.0                                | 6.12                       | 3.1                             | 47.9                               | 53                       |
|                           |                              | 1b       | 53.2                        | 5.3                | 63                    | 6.30                  | 2.9                                   | 53.0                                | 6.10                       | 3.0                             | 48.2                               | 55                       |
| L1                        | W                            | 3a       | 53.5                        | 5.4                | 65                    | 6.33                  | 2.9                                   | 53.2                                | 6.04                       | 3.2                             | 50.1                               | 30                       |
|                           |                              | 3b       | 53.7                        | 5.5                | 65                    | 6.28                  | 2.9                                   | 53.2                                | 6.10                       | 3.2                             | 51.2                               | 33                       |
| L1                        | W                            | 5a       | 53.5                        | 5.4                | 65                    | 6.34                  | 2.5                                   | 53.4                                | 6.11                       | 2.9                             | 51.0                               | 35                       |
|                           |                              | 5b       | 53.4                        | 5.6                | 66                    | 6.34                  | 2.6                                   | 53.3                                | 6.10                       | 2.9                             | 50.9                               | 30                       |
| L1                        | W                            | 7a       | 53.3                        | 5.0                | 75                    | 6.33                  | 2.6                                   | 53.6                                | 6.09                       | 3.1                             | 50.9                               | 30                       |
|                           |                              | 7b       | 53.3                        | 5.1                | 70                    | 6.30                  | 2.8                                   | 53.5                                | 6.09                       | 3.1                             | 50.9                               | 30                       |
| L1                        | C                            | 9a       | 53.4                        | 4.5                | 73                    | 6.29                  | 2.9                                   | 53.4                                | 6.02                       | 3.4                             | 50.9                               | 33                       |
|                           |                              | 9b       | 53.4                        | 5.2                | 73                    | 6.28                  | 2.9                                   | 53.3                                | 6.06                       | 3.3                             | 50.8                               | 30                       |
| L1                        | C                            | 11a      | 53.3                        | 5.1                | 72                    | 6.32                  | 3.0                                   | 53.3                                | 6.06                       | 3.4                             | 50.6                               | 35                       |
|                           |                              | 11b      | 53.3                        | 5.2                | 63                    | 6.29                  | 3.1                                   | 53.3                                | 6.11                       | 3.2                             | 50.9                               | 50                       |
|                           |                              | average  | 53.4 <sup>A</sup>           | 5.2 <sup>A</sup>   | 68 <sup>A</sup>       | 6.31 <sup>A</sup>     | 2.8 <sup>A</sup>                      | 53.3 <sup>A</sup>                   | 6.13 <sup>A</sup>          | 3.2 <sup>A</sup>                | 50.4 <sup>A</sup>                  | 37 <sup>A</sup>          |
|                           |                              | SD       | 0.1                         | 0.3                | 5                     | 0.02                  | 0.2                                   | 0.2                                 | 0.15                       | 0.2                             | 1.1                                | 10                       |
| L2                        | C                            | 2a       | 53.4                        | 5.2                | 60                    | 6.30                  | 2.8                                   | 53.0                                | 6.11                       | 3.0                             | 50.5                               | 40                       |
|                           |                              | 2b       | 53.3                        | 5.0                | 65                    | 6.30                  | 2.8                                   | 53.0                                | 6.09                       | 3.0                             | 49.0                               | 32                       |
| L2                        | W                            | 4a       | 53.4                        | 5.4                | 69                    | 6.30                  | 2.8                                   | 53.0                                | 6.10                       | 3.0                             | 50.4                               | 22                       |
|                           |                              | 4b       | 53.7                        | 4.6                | 71                    | 6.31                  | 2.8                                   | 53.4                                | 6.15                       | 3.1                             | 51.0                               | 22                       |
| L2                        | W                            | 6a       | 53.8                        | 5.5                | 70                    | 6.31                  | 2.6                                   | 53.7                                | 6.10                       | 2.9                             | 51.0                               | 33                       |
|                           |                              | 6b       | 53.8                        | 5.1                | 65                    | 6.31                  | 2.7                                   | 55.1                                | 6.15                       | 2.8                             | 52.6                               | 40                       |
| L2                        | W                            | 8a       | 54.0                        | 5.0                | 75                    | 6.29                  | 2.7                                   | 53.8                                | 6.04                       | 3.1                             | 51.2                               | 43                       |
|                           |                              | 8b       | 53.5                        | 5.1                | 77                    | 6.30                  | 2.9                                   | 53.3                                | 6.01                       | 3.2                             | 51.0                               | 35                       |
| L2                        | C                            | 10a      | 53.6                        | 5.0                | 70                    | 6.31                  | 2.9                                   | 53.5                                | 6.05                       | 3.2                             | 50.4                               | 45                       |
|                           |                              | 10b      | 53.4                        | 5.2                | 62                    | 6.31                  | 2.9                                   | 53.4                                | 6.08                       | 3.1                             | 50.9                               | 40                       |
| L2                        | C                            | 12a      | 53.3                        | 5.0                | 73                    | 6.32                  | 2.6                                   | 53.3                                | 6.14                       | 2.9                             | 51.2                               | 25                       |
|                           |                              | 12b      | 53.5                        | 5.1                | 71                    | 6.32                  | 2.6                                   | 53.5                                | 6.12                       | 3.0                             | 51.0                               | 20                       |
|                           |                              | average  | 53.6 <sup>B</sup>           | 5.1 <sup>A</sup>   | 69 <sup>A</sup>       | 6.31 <sup>A</sup>     | 2.8 <sup>A</sup>                      | 53.5 <sup>A</sup>                   | 6.10 <sup>A</sup>          | 3.0 <sup>B</sup>                | 50.9 <sup>A</sup>                  | 33 <sup>A</sup>          |
|                           |                              | SD       | 0.2                         | 0.2                | 5                     | 0.01                  | 0.1                                   | 0.6                                 | 0.04                       | 0.1                             | 0.8                                | 9                        |

| Cheesemaking trials       |                              |          | Cheesemaking parameters |                   |                   |                          |                      |                               |                   |                              |                                   |                    |                    |                    |                   |                      |                       |
|---------------------------|------------------------------|----------|-------------------------|-------------------|-------------------|--------------------------|----------------------|-------------------------------|-------------------|------------------------------|-----------------------------------|--------------------|--------------------|--------------------|-------------------|----------------------|-----------------------|
| Milk quality <sup>1</sup> | Climatic period <sup>2</sup> | trial nr | Final cheese whey       |                   |                   | Curd molding and salting |                      |                               |                   |                              | Curd composition at first turning |                    |                    |                    |                   |                      |                       |
|                           |                              |          | fat (%)                 | protein (%)       | dry matter (%)    | first turning (min)      | second turning (min) | curd yield before salting (%) | salting time (d)  | curd after salting yield (%) | pH                                | fat (%)            | protein (%)        | dry matter (%)     | fat on DM, ratio  | protein on DM, ratio | fat to protein, ratio |
| L1                        | C                            | 1a       | 0.82                    | 0.91              | 7.94              | 132                      | 165                  | 8.83                          | 20.5              | 8.56                         | 5.83                              | 25.68              | 30.01              | 58.97              | 0.44              | 0.51                 | 0.86                  |
|                           |                              | 1b       | 0.60                    | 0.93              | 7.72              | 185                      | 160                  | 9.02                          | 20.5              | 8.75                         | 5.66                              | 26.50              | 28.54              | 58.01              | 0.46              | 0.49                 | 0.93                  |
| L1                        | W                            | 3a       | 0.62                    | 0.91              | 7.77              | 200                      | 170                  | 8.90                          | 20.5              | 8.62                         | 5.35                              | 27.29              | 30.39              | 60.95              | 0.45              | 0.50                 | 0.90                  |
|                           |                              | 3b       | 0.87                    | 0.90              | 7.97              | 142                      | 160                  | 8.54                          | 20.5              | 8.27                         | 5.49                              | 24.79              | 29.89              | 57.81              | 0.43              | 0.52                 | 0.83                  |
| L1                        | W                            | 5a       | 0.43                    | 0.92              | 7.59              | 206                      | 180                  | 8.67                          | 20.5              | 8.42                         | 5.38                              | 26.87              | 30.69              | 59.97              | 0.45              | 0.51                 | 0.88                  |
|                           |                              | 5b       | 0.46                    | 0.91              | 7.62              | 150                      | 170                  | 8.45                          | 20.5              | 8.20                         | 5.53                              | 26.97              | 30.90              | 60.39              | 0.45              | 0.51                 | 0.87                  |
| L1                        | W                            | 7a       | 0.45                    | 0.91              | 7.61              | 210                      | 165                  | 8.33                          | 20.5              | 8.08                         | 5.33                              | 25.45              | 30.92              | 59.28              | 0.43              | 0.52                 | 0.82                  |
|                           |                              | 7b       | 0.49                    | 0.90              | 7.63              | 140                      | 175                  | 8.21                          | 20.5              | 7.97                         | 5.48                              | 25.59              | 30.92              | 59.55              | 0.43              | 0.52                 | 0.83                  |
| L1                        | C                            | 9a       | 0.54                    | 0.95              | 7.74              | 110                      | 160                  | 8.91                          | 20.5              | nd                           | 5.27                              | 27.47              | 30.77              | 62.15              | 0.44              | 0.50                 | 0.89                  |
|                           |                              | 9b       | 0.44                    | 0.95              | 7.68              | 167                      | 165                  | 9.09                          | 20.5              | nd                           | 5.22                              | 28.50              | 30.96              | 62.14              | 0.46              | 0.50                 | 0.92                  |
| L1                        | C                            | 11a      | 0.47                    | 0.97              | 7.69              | 175                      | 185                  | 9.09                          | 29.0              | 8.76                         | 5.12                              | 26.22              | 33.01              | 61.60              | 0.43              | 0.54                 | 0.79                  |
|                           |                              | 11b      | 0.51                    | 0.96              | 7.72              | 115                      | 185                  | 8.80                          | 29.0              | 8.48                         | 5.37                              | 26.19              | 32.94              | 62.73              | 0.42              | 0.53                 | 0.79                  |
|                           |                              | average  | 0.56 <sup>A</sup>       | 0.93 <sup>A</sup> | 7.72 <sup>A</sup> | 161 <sup>A</sup>         | 170 <sup>A</sup>     | 8.74 <sup>A</sup>             | 21.9 <sup>A</sup> | 8.41 <sup>A</sup>            | 5.42 <sup>A</sup>                 | 26.46 <sup>A</sup> | 30.83 <sup>A</sup> | 60.29 <sup>A</sup> | 0.44 <sup>A</sup> | 0.51 <sup>A</sup>    | 0.86 <sup>A</sup>     |
|                           |                              | SD       | 0.15                    | 0.02              | 0.12              | 35                       | 9                    | 0.30                          | 3.3               | 0.27                         | 0.19                              | 1.03               | 1.22               | 1.65               | 0.01              | 0.01                 | 0.05                  |
| L2                        | C                            | 2a       | 0.68                    | 0.93              | 7.79              | 145                      | 165                  | 8.60                          | 20.5              | 8.25                         | 5.47                              | 24.03              | 31.66              | 58.56              | 0.41              | 0.54                 | 0.76                  |
|                           |                              | 2b       | 0.66                    | 0.93              | 7.76              | 203                      | 165                  | 8.50                          | 20.5              | 8.15                         | 5.40                              | 23.54              | 30.92              | 57.30              | 0.41              | 0.54                 | 0.76                  |
| L2                        | W                            | 4a       | 0.40                    | 0.95              | 7.56              | 195                      | 180                  | 8.55                          | 20.5              | 8.28                         | 5.29                              | 25.15              | 30.98              | 58.69              | 0.43              | 0.53                 | 0.81                  |
|                           |                              | 4b       | 0.45                    | 1.00              | 7.95              | 138                      | 175                  | 8.67                          | 20.5              | 8.40                         | 5.37                              | 24.99              | 30.90              | 59.19              | 0.42              | 0.52                 | 0.81                  |
| L2                        | W                            | 6a       | 0.43                    | 0.95              | 7.49              | 220                      | 160                  | 8.31                          | 20.5              | 8.05                         | 5.24                              | 25.39              | 31.97              | 59.74              | 0.42              | 0.54                 | 0.79                  |
|                           |                              | 6b       | 0.42                    | 0.95              | 7.48              | 165                      | 150                  | 8.40                          | 20.5              | 8.14                         | 5.62                              | 25.20              | 31.25              | 59.58              | 0.42              | 0.52                 | 0.81                  |
| L2                        | W                            | 8a       | 0.38                    | 0.97              | 7.50              | 132                      | 185                  | 8.33                          | 20.5              | 8.08                         | 5.15                              | 23.07              | 33.29              | 60.34              | 0.38              | 0.55                 | 0.69                  |
|                           |                              | 8b       | 0.39                    | 0.96              | 7.50              | 205                      | 185                  | 8.21                          | 20.5              | 7.96                         | 5.09                              | 22.64              | 32.66              | 58.94              | 0.38              | 0.55                 | 0.69                  |
| L2                        | C                            | 10a      | 0.44                    | 1.03              | 7.64              | 180                      | 180                  | 8.89                          | 28.0              | 8.56                         | 5.19                              | 24.51              | 33.27              | 60.37              | 0.41              | 0.55                 | 0.74                  |
|                           |                              | 10b      | 0.46                    | 1.03              | 7.64              | 135                      | 180                  | 9.09                          | 28.0              | 8.75                         | 5.24                              | 24.14              | 32.73              | 59.85              | 0.40              | 0.55                 | 0.74                  |
| L2                        | C                            | 12a      | 0.44                    | 1.01              | 7.64              | 140                      | 180                  | 9.06                          | 21.5              | 8.78                         | 5.21                              | 24.07              | 32.35              | 58.85              | 0.41              | 0.55                 | 0.74                  |
|                           |                              | 12b      | 0.40                    | 1.02              | 7.60              | 140                      | 180                  | 8.95                          | 21.5              | 8.64                         | 5.19                              | 24.43              | 32.48              | 59.20              | 0.41              | 0.55                 | 0.75                  |
|                           |                              | average  | 0.46 <sup>A</sup>       | 0.98 <sup>B</sup> | 7.63 <sup>A</sup> | 167 <sup>A</sup>         | 174 <sup>A</sup>     | 8.63 <sup>A</sup>             | 21.9 <sup>A</sup> | 8.34 <sup>A</sup>            | 5.29 <sup>A</sup>                 | 24.26 <sup>B</sup> | 32.04 <sup>B</sup> | 59.22 <sup>A</sup> | 0.41 <sup>B</sup> | 0.54 <sup>B</sup>    | 0.76 <sup>B</sup>     |
|                           |                              | SD       | 0.10                    | 0.04              | 0.14              | 32                       | 11                   | 0.30                          | 2.9               | 0.28                         | 0.15                              | 0.87               | 0.89               | 0.85               | 0.01              | 0.01                 | 0.04                  |

<sup>1</sup>milk from farms recognized for low (L1) or high (L2) content of butyric clostridia spores.

<sup>2</sup>climate of the period when the cheesemaking was carried out: warm (W), cool (C).

<sup>A,B</sup> average values in column with different capital letters are different ( $P < 0.05$ )
