# Supplementary material for: Low-Level Clostridial Spores’ Milk to Limit the Onset of Late Blowing Defect in Lysozyme-Free, Grana-Type Cheese
Source: MDPI journal article supplement (doi:10.3390/foods12091880), 2023-05-02
Supplement: s1 [file s1]

Table S1. Microbiological parameters of vat milk and Grana-type cheeses.

| Cheesemaking trials       |                              |          | Vat milk                |                   | Cheese                  |                   |                         |                   |                   |
|---------------------------|------------------------------|----------|-------------------------|-------------------|-------------------------|-------------------|-------------------------|-------------------|-------------------|
| Milk quality <sup>1</sup> | Climatic period <sup>2</sup> | trial nr | ANSB                    | BCS               | ANSB                    | BCS               | TMB                     | PB                | ASB               |
|                           |                              |          | log MPN L <sup>-1</sup> |                   | log MPN g <sup>-1</sup> |                   | log cfu g <sup>-1</sup> |                   |                   |
| L1                        | C                            | 1        | 3.18                    | 3.18              | -0.32                   | -0.32             | 4.79                    | 0.70              | 2.65              |
| L1                        | W                            | 3        | 4.66                    | 1.68              | 1.63                    | -0.32             | 6.04                    | 0.70              | 2.74              |
| L1                        | W                            | 5        | 2.56                    | 1.68              | 0.56                    | 0.56              | 4.53                    | 0.70              | 2.81              |
| L1                        | W                            | 7        | 3.63                    | 1.68              | 0.96                    | 0.96              | 4.77                    | 0.70              | 2.54              |
| L1                        | C                            | 9        | 3.63                    | 1.68              | 0.96                    | 0.96              | 6.05                    | 0.70              | 2.30              |
| L1                        | C                            | 11       | 3.36                    | 1.68              | 0.56                    | -0.32             | 5.12                    | 0.70              | 1.00              |
|                           |                              | average  | 3.50 <sup>A</sup>       | 1.93 <sup>A</sup> | 0.73 <sup>A</sup>       | 0.25 <sup>A</sup> | 5.21 <sup>A</sup>       | 0.70 <sup>A</sup> | 2.34 <sup>A</sup> |
|                           |                              | SD       | 0.69                    | 0.61              | 0.65                    | 0.65              | 0.67                    | 0.00              | 0.68              |
| L2                        | C                            | 2        | 3.63                    | 3.36              | 1.36                    | 1.36              | 5.69                    | 0.70              | 2.54              |
| L2                        | W                            | 4        | 2.96                    | 1.68              | 4.66                    | 4.66              | 6.09                    | 0.70              | 3.08              |
| L2                        | W                            | 6        | 3.63                    | 3.36              | 2.38                    | 2.38              | 5.00                    | 0.70              | 2.81              |
| L2                        | W                            | 8        | 2.96                    | 2.96              | 5.04                    | 5.04              | 5.51                    | 2.74              | 2.60              |
| L2                        | C                            | 10       | 3.63                    | 3.63              | 4.66                    | 4.38              | 6.18                    | 0.70              | 2.60              |
| L2                        | C                            | 12       | 3.18                    | 2.96              | 3.38                    | 3.38              | 6.48                    | 0.70              | 1.70              |
|                           |                              | average  | 3.33 <sup>A</sup>       | 2.99 <sup>B</sup> | 3.58 <sup>B</sup>       | 3.53 <sup>B</sup> | 5.83 <sup>A</sup>       | 1.04 <sup>A</sup> | 2.56 <sup>A</sup> |
|                           |                              | SD       | 0.34                    | 0.69              | 1.48                    | 1.44              | 0.53                    | 0.83              | 0.46              |

ANSB: anaerobic sporeforming bacteria; BCS: butyric clostridia spores; TMB: total mesophilic bacteria;

PB: propionibacteria; ASB: aerobic sporeforming bacteria.

<sup>1</sup>milk from farms recognized for low (L1) or high (L2) content of butyric clostridia spores.

<sup>2</sup>climate of the period when the cheesemaking was carried out: warm (W), cool (C).

<sup>A,B</sup> average values in column with different capital letters are different ( $P < 0.05$ )
