# Supplementary material for: Low-Level Clostridial Spores’ Milk to Limit the Onset of Late Blowing Defect in Lysozyme-Free, Grana-Type Cheese
Source: MDPI journal article supplement (doi:10.3390/foods12091880), 2023-05-02
Supplement: s1 [file s1]

Table S2. Milk creaming. Processing parameters and chemical composition of starting bulk milk and residual final cream.

| Cheesemaking trials       |                              |          | Bulk milk ( <i>composition</i> ) |                   |                        |                    | Milk creaming process<br><i>starting parameters</i> |                       |                   |                                     |
|---------------------------|------------------------------|----------|----------------------------------|-------------------|------------------------|--------------------|-----------------------------------------------------|-----------------------|-------------------|-------------------------------------|
| Milk quality <sup>1</sup> | Climatic period <sup>2</sup> | trial nr | fat (%)                          | protein (%)       | fat to protein (ratio) | dry matter (%)     | environment temperature (°C)                        | milk temperature (°C) | milk pH           | milk titratable acidity (°SH/50 ml) |
| L1                        | C                            | 1a       | 4.00                             | 3.32              | 1.21                   | 13.33              | 17.3                                                | 10,0                  | 6.68              | 3.3                                 |
|                           |                              | 1b       | 3.93                             | 3.31              | 1.19                   | 13.18              | 17.3                                                | 10,0                  | 6.68              | 3.3                                 |
| L1                        | W                            | 3a       | 3.88                             | 3.29              | 1.18                   | 13.13              | 20.6                                                | 9.4                   | 6.63              | 3.1                                 |
|                           |                              | 3b       | 3.90                             | 3.29              | 1.19                   | 13.16              | 20.6                                                | 8.4                   | 6.63              | 3.7                                 |
| L1                        | W                            | 5a       | 3.86                             | 3.26              | 1.18                   | 13.11              | 22.4                                                | 10.2                  | 6.63              | 3.2                                 |
|                           |                              | 5b       | 3.84                             | 3.26              | 1.18                   | 13.08              | 22.4                                                | 10,0                  | 6.63              | 3.2                                 |
| L1                        | W                            | 7a       | 3.83                             | 3.24              | 1.19                   | 13.05              | 23.6                                                | 10.5                  | 6.68              | 3.2                                 |
|                           |                              | 7b       | 3.83                             | 3.23              | 1.19                   | 13.05              | 23.6                                                | 10.2                  | 6.66              | 3.2                                 |
| L1                        | C                            | 9a       | 4.11                             | 3.35              | 1.23                   | 13.41              | 21,0                                                | 10.9                  | 6.72              | 3.3                                 |
|                           |                              | 9b       | 4.08                             | 3.33              | 1.23                   | 13.38              | 21,0                                                | 10.9                  | 6.73              | 3.3                                 |
| L1                        | C                            | 11a      | 3.98                             | 3.45              | 1.15                   | 13.39              | 20,0                                                | 10.4                  | 6.71              | 3.3                                 |
|                           |                              | 11b      | 3.96                             | 3.46              | 1.14                   | 13.38              | 20,0                                                | 10.6                  | 6.72              | 3.3                                 |
|                           |                              | average  | 3.93 <sup>A</sup>                | 3.32 <sup>A</sup> | 1.19 <sup>A</sup>      | 13.22 <sup>A</sup> | 20.8 <sup>A</sup>                                   | 10.1 <sup>A</sup>     | 6.68 <sup>A</sup> | 3.3 <sup>A</sup>                    |
|                           |                              | SD       | 0.09                             | 0.07              | 0.03                   | 0.14               | 2.1                                                 | 0.7                   | 0.04              | 0.1                                 |
| L2                        | C                            | 2a       | 3.85                             | 3.33              | 1.16                   | 13.12              | 21.0                                                | 10.0                  | 6.66              | 3.1                                 |
|                           |                              | 2b       | 3.85                             | 3.32              | 1.16                   | 13.07              | 21.0                                                | 10.0                  | 6.67              | 3.1                                 |
| L2                        | W                            | 4a       | 3.79                             | 3.37              | 1.12                   | 13.10              | 21.7                                                | 10.2                  | 6.70              | 3.1                                 |
|                           |                              | 4b       | 3.79                             | 3.36              | 1.13                   | 13.09              | 21.7                                                | 9.7                   | 6.69              | 3.1                                 |
| L2                        | W                            | 6a       | 3.84                             | 3.32              | 1.16                   | 13.06              | 23.9                                                | 10.2                  | 6.78              | 3.1                                 |
|                           |                              | 6b       | 3.82                             | 3.33              | 1.15                   | 13.04              | 23.9                                                | 10.2                  | 6.70              | 3.1                                 |
| L2                        | W                            | 8a       | 3.70                             | 3.35              | 1.10                   | 12.99              | 22.5                                                | 10.7                  | 6.68              | 3.1                                 |
|                           |                              | 8b       | 3.72                             | 3.35              | 1.11                   | 13.01              | 22.5                                                | 10.3                  | 6.67              | 3.1                                 |
| L2                        | C                            | 10a      | 3.92                             | 3.60              | 1.09                   | 13.42              | 20.3                                                | 10.1                  | 6.80              | 3.3                                 |
|                           |                              | 10b      | 3.86                             | 3.60              | 1.07                   | 13.38              | 20.3                                                | 10.3                  | 6.78              | 3.3                                 |
| L2                        | C                            | 12a      | 3.98                             | 3.60              | 1.11                   | 13.47              | 23.0                                                | 11.0                  | 6.76              | 3.4                                 |
|                           |                              | 12b      | 3.97                             | 3.59              | 1.11                   | 13.47              | 23.0                                                | 10.7                  | 6.76              | 3.4                                 |
|                           |                              | average  | 3.84 <sup>B</sup>                | 3.43 <sup>B</sup> | 1.12 <sup>B</sup>      | 13.19 <sup>A</sup> | 22.1 <sup>A</sup>                                   | 10.3 <sup>A</sup>     | 6.72 <sup>B</sup> | 3.2 <sup>A</sup>                    |
|                           |                              | SD       | 0.09                             | 0.13              | 0.03                   | 0.19               | 1.3                                                 | 0.4                   | 0.05              | 0.1                                 |

| Cheesemaking trials       |                              |          | Milk creaming process<br><i>ending parameters</i> |                       |                   |                                     |                     |                                | Cream<br>(composition) |                   |                    |
|---------------------------|------------------------------|----------|---------------------------------------------------|-----------------------|-------------------|-------------------------------------|---------------------|--------------------------------|------------------------|-------------------|--------------------|
| Milk quality <sup>1</sup> | Climatic period <sup>2</sup> | trial nr | environment temperature (°C)                      | milk temperature (°C) | milk pH           | milk titratable acidity (°SH/50 ml) | creaming time (min) | separated cream, quantity (kg) | fat (%)                | protein (%)       | dry matter (%)     |
| L1                        | C                            | 1a       | 17.4                                              | 13.0                  | 6.61              | 3.4                                 | 371                 | 28.61                          | 21.02                  | 2.80              | nd                 |
|                           |                              | 1b       | 17.4                                              | 12.2                  | 6.60              | 3.4                                 | 352                 | 28.79                          | 19.98                  | 2.85              | nd                 |
| L1                        | H                            | 3a       | 21.5                                              | 13.8                  | 6.66              | 3.2                                 | 334                 | 32.23                          | 19.49                  | 2.84              | 27.26              |
|                           |                              | 3b       | 22.2                                              | 14.0                  | 6.65              | 3.2                                 | 353                 | 31.46                          | 19.73                  | 2.83              | 27.48              |
| L1                        | H                            | 5a       | 23.7                                              | 15.4                  | 6.63              | 3.3                                 | 360                 | 33.77                          | 21.67                  | 2.76              | 29.31              |
|                           |                              | 5b       | 24.1                                              | 16.0                  | 6.73              | 3.2                                 | 385                 | 34.09                          | 22.16                  | 2.74              | 29.78              |
| L1                        | H                            | 7a       | 24.4                                              | 16.2                  | 6.68              | 3.2                                 | 360                 | 36.52                          | 20.93                  | 2.76              | 28.57              |
|                           |                              | 7b       | 24.7                                              | 16.1                  | 6.66              | 3.3                                 | 380                 | 38.15                          | 21.58                  | 2.74              | 29.20              |
| L1                        | C                            | 9a       | 21.8                                              | 15.4                  | 6.79              | 3.3                                 | 406                 | 31.31                          | 22.57                  | 2.81              | 30.29              |
|                           |                              | 9b       | 21.8                                              | 15.3                  | 6.79              | 3.3                                 | 390                 | 31.60                          | 21.33                  | 2.82              | 29.07              |
| L1                        | C                            | 11a      | 20.0                                              | 15.1                  | 6.73              | 3.4                                 | 418                 | 37.40                          | 20.96                  | 2.89              | 28.80              |
|                           |                              | 11b      | 20.0                                              | 15.1                  | 6.73              | 3.4                                 | 425                 | 35.45                          | 21.54                  | 2.87              | 29.30              |
|                           |                              | average  | 21.6 <sup>A</sup>                                 | 14.8 <sup>A</sup>     | 6.69 <sup>A</sup> | 3.3 <sup>A</sup>                    | 378 <sup>A</sup>    | 33.28 <sup>A</sup>             | 21.08 <sup>A</sup>     | 2.81 <sup>A</sup> | 28.91 <sup>A</sup> |
|                           |                              | SD       | 2.5                                               | 1.3                   | 0.06              | 0.1                                 | 28                  | 3.16                           | 0.95                   | 0.05              | 0.94               |
| L2                        | C                            | 2a       | 21.2                                              | 14.4                  | 6.75              | 3.3                                 | 390                 | 36.50                          | 20.05                  | 2.84              | 27.80              |
|                           |                              | 2b       | 20.7                                              | 14.2                  | 6.73              | 3.3                                 | 360                 | 35.28                          | 20.70                  | 2.81              | 28.40              |
| L2                        | H                            | 4a       | 22.4                                              | 14.8                  | 6.68              | 3.1                                 | 360                 | 38.07                          | 19.99                  | 2.86              | 27.75              |
|                           |                              | 4b       | nd                                                | 14.4                  | 6.68              | 3.1                                 | 370                 | 36.05                          | 19.81                  | 2.87              | 27.59              |
| L2                        | H                            | 6a       | 24.2                                              | 16.1                  | 6.67              | 3.2                                 | 360                 | 39.67                          | 20.83                  | 2.79              | 28.51              |
|                           |                              | 6b       | nd                                                | 16.7                  | 6.70              | 3.2                                 | 367                 | 40.67                          | 20.15                  | 2.82              | 27.87              |
| L2                        | H                            | 8a       | 23.0                                              | 16.5                  | 6.64              | 3.2                                 | 383                 | 42.81                          | 20.01                  | 2.85              | 27.77              |
|                           |                              | 8b       | 23.0                                              | 15.2                  | 6.68              | 3.2                                 | 358                 | 45.14                          | 18.95                  | 2.89              | 26.76              |
| L2                        | C                            | 10a      | 20.3                                              | 14.6                  | 6.75              | 3.4                                 | 425                 | 39.78                          | 19.95                  | 3.04              | nd                 |
|                           |                              | 10b      | 20.3                                              | 15.0                  | 6.76              | 3.4                                 | 428                 | 39.32                          | 19.92                  | 3.05              | nd                 |
| L2                        | C                            | 12a      | 22.6                                              | 17.6                  | 6.75              | 3.5                                 | 432                 | 43.46                          | 20.61                  | 2.99              | 28.55              |
|                           |                              | 12b      | 22.6                                              | 17.6                  | 6.77              | 3.5                                 | 420                 | 39.15                          | 21.89                  | 2.95              | 29.77              |
|                           |                              | average  | 22.0 <sup>A</sup>                                 | 15.6 <sup>A</sup>     | 6.71 <sup>A</sup> | 3.3 <sup>A</sup>                    | 388 <sup>A</sup>    | 39.66 <sup>B</sup>             | 20.24 <sup>B</sup>     | 2.90 <sup>B</sup> | 28.08 <sup>B</sup> |
|                           |                              | SD       | 1.3                                               | 1.3                   | 0.04              | 0.1                                 | 30                  | 3.02                           | 0.71                   | 0.09              | 0.79               |

<sup>1</sup>milk from farms recognized for low (L1) or high (L2) content of butyric clostridia spores.

<sup>2</sup>climate of the period when the cheesemaking was carried out: warm (W), cool (C)

<sup>A,B</sup> average values in column with different capital letters are different ( $P < 0.05$ )
