# Supplementary figures and images for: Low-Level Clostridial Spores’ Milk to Limit the Onset of Late Blowing Defect in Lysozyme-Free, Grana-Type Cheese
Source: MDPI journal article supplement (doi:10.3390/foods12091880), 2023-05-02

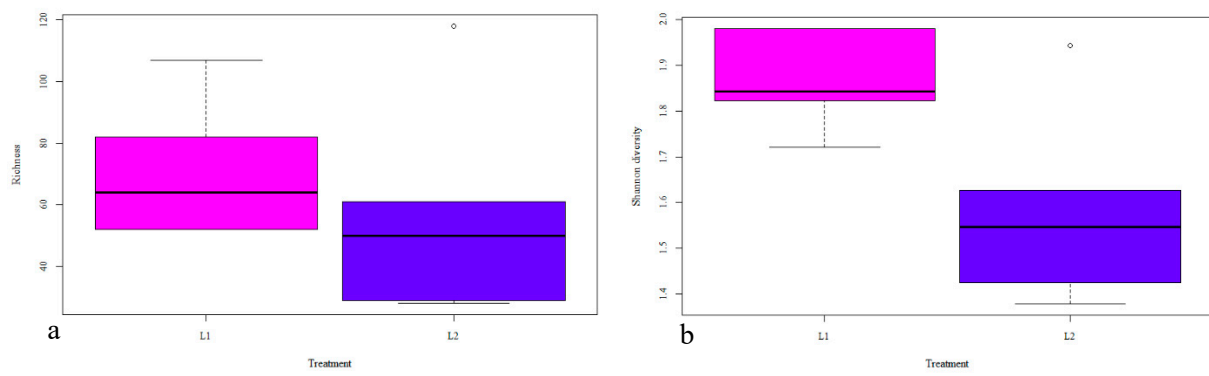

Figure S2. Richness (a) and Shannon diversity (b) of L1 and L2 Grana-like cheese samples.

Supplement: s1 [file s1]
